## **Title Page:**

# **Improvement of language function after Contralateral Seventh Cervical Nerve Transfer in hemiplegic patients combined with post-stroke aphasia: a prospective observational cohort study**

## **Affiliations:**

<sup>1,2</sup> Juntao Feng\*, <sup>1,2</sup> Tie Li\*, <sup>5</sup> Minzhi Lv, <sup>1</sup> Miaomiao Xu, <sup>1</sup> Jingrui Yang, <sup>1</sup> Fan Su, <sup>1</sup> Ruiping Hu, <sup>1</sup> Jie Li, <sup>1,2</sup> Yundong Shen, <sup>1-4</sup> Wendong Xu

<sup>1</sup> Department of Hand and Upper Extremity Surgery of Jing'an District Central Hospital, the Hand Surgery department and Rehabilitation Department of Huashan Hospital, Fudan University, Shanghai, China

<sup>2</sup> The National Clinical Research Center for Aging and Medicine, Huashan Hospital, Fudan University, Shanghai, China

<sup>3</sup> Institute of Brain Science, State Key Laboratory of Medical Neurobiology and Collaborative Innovation Center for Brain Science, Fudan University, Shanghai, 200040, China.

<sup>4</sup> Research unit of synergistic reconstruction of upper and lower limbs after brain injury, Chinese Academy of Medical Sciences.

<sup>5</sup> Center of Evidence-Based Medicine, Department of Biostatistics, School of Public Health, Fudan University, Shanghai, China

\* These authors contributed equally to this work.

## **Corresponding author:**

Prof. Wendong Xu M.D.& Ph.D.

Department of Hand Surgery, Huashan Hospital, Fudan University

No. 12 Middle Wulumuqi Rd., Shanghai 200040, China

Tel: 0086-21- 61578000; Fax: 0086-21- 61578000

E-mail: wendongxu@fudan.edu.cn

## **Authors' contributions:**

WD Xu, YD Shen, RP Hu and Jie Jia participated in the concept and design of the study. JT

Feng, Tie Li, MM Xu, JR Yang, Fan Su participated in the data collection and preparation of

this study. JT Feng, Tie Li, MZ Lv participated in the data analysis and interpretation. WD Xu, JT Feng, Tie Li drafted the article. All of the authors critically revised the article and reviewed the submitted version of the manuscript. WD Xu approved the final version of the manuscript and decided the submission on behalf of all the authors.

**Details of previous presentations:** None.

**Interests of conflict:** The authors have no conflict of interest concerning the materials or methods used in this study or the findings specified in this article.

**Funding Resources:**

This study was funded by the National Natural Science Foundation of China (82021002, 81830063 and 82072539), CAMS Innovation Fund for Medical Sciences (2019-I2M-5-007), Shanghai Clinical Research Center for Aging and Medicine (19MC1910500), National key R&D program of China (2022YFC3602701), Shanghai Municipal Clinical Medical Center Project(2022ZZ01007).

**Ethic committee approval:** The study was approved by the institutional review board of Shanghai Jing'an District Central Hospital and registered on [www.chictr.org.cn](http://www.chictr.org.cn) (number: ChiCTR2200060235). Signed consent in this study were acquired from all the patients participated in.

## **Abstract**

### **Background**

While the contralateral seventh cervical nerve (CC7) cross transfer was designed to reconstruct paralyzed arm function after stroke, improvement in language function was found in patients combined with aphasia.

### **Objective**

To evaluate the effect of improvement in language function after CC7 cross transfer in stroke patients with chronic aphasia and explore its potential mechanism.

### **Methods**

In a prospective observative cohort, patients diagnosed with hemiplegia combined with aphasia were included. The language function was evaluated through the changes of Aphasia Quotient evaluated by Western Aphasia Battery (WAB-AQ) as well as its four subtests from baseline to 1 week and 6 months after the surgery. Patients also received oral agility test by Boston Diagnostic Aphasia Examination (BDAE-OA). Resting-state functional MRI (rs-fMRI) was scanned before and over 6 months after the surgery to explore the potential central mechanism in language improvements.

### **Results**

The average increase of WAB-AQ was 8.08 points from baseline to 1 week post-operatively ( $P < 0.001$ , 95%CI: 5.05-11.10), and 9.51 from baseline to 6-month ( $P < 0.001$ , 95%CI: 6.75-12.27). In 8 patients who participant in BDAE-OA, the average increase was 3.7 points (95%CI: 0.56-6.84; corrected  $P = 0.023$ ) from baseline to 1-week follow-up, and 5.3 points from baseline to 6 months follow-up. Significant higher local activity was detected at right precentral cortex, right gyrus rectus, and right anterior cingulate cortex after the surgery from rs-fMRI.

### **Conclusions**

Immediate and stable improvement in language function was detected after CC7 cross transfer in hemiplegic patients combined with aphasia, which may be realized through enhanced function of language network in the bilateral hemisphere.

**Key Words:** Aphasia, contralateral seventh cervical nerve cross transfer, hemiplegia, right hemisphere compensation.

## Introduction

Aphasia is a common and disabling sequela after stroke<sup>1</sup>. It has been estimated that more than one third of the stroke patients have symptoms of aphasia of different severity<sup>2</sup>. In patients who enter the chronic phase (generally defined as >6 months or 1 year), slight or none spontaneous progress could be seen<sup>3,4</sup>. While the speech and language rehabilitation treatment (SLT) has been proved to be effective in improving the symptoms, the effect sizes are often unsatisfactory to demand in daily life<sup>5-7</sup>. Therefore, more effective and long-term stable interventions are still urgently needed.

As patients with right limb paralysis due to left hemispheric injury are often combined with aphasia, a unique phenomenon is frequently mentioned that, after spinal nerve resection such as selective dorsal rhizotomy, the patient's language function can be significantly improved<sup>8,9</sup>. However, this phenomenon has not been fully quantified since the surgical procedure varies in each patient. Moreover, the mechanism underlying this phenomenon is not carefully studied either. Therefore, to what extent spinal nerve resection surgery can benefit language function and through which kind of mechanism still needs to be evaluated.

The contralateral cervical seventh nerve (CC7) cross transfer has been proved to effective in improving the paralyzed upper limb function of chronic hemiplegia patients due to stroke or other brain injuries<sup>10</sup>. In this surgery, one of the five nerve roots of the brachial plexus, the C7 nerve root, is rewired from the contralateral side to the paralyzed side, which established a direct connection between the paralyzed upper limb and its ipsilateral hemisphere, the intact hemisphere. Through animal and clinical observation of the brain plasticity, it shows that this surgery will induce large-scale functional plasticity<sup>11</sup>. In the following observational study, it has been reported that, the functional improvement is not restricted to the upper limb function, but also in gait and lower limb spasticity<sup>12</sup>. Therefore, this surgery seemed to induced systematic functional remodeling rather than improving motor function alone. With a long-term observation of these patients, we found that this surgery can also significantly improve the language function in hemiplegia patients combined with chronic aphasia. This surgery provided a better study model for exploring this phenomenon.

Therefore, in this study, we aim quantify the effectiveness and stability of the improvement

in language through a prospective cohort study with six-months follow-up. Since functional MRI has contributed important evidences for understanding of language networks and compensational mechanisms in aphasia patients<sup>1</sup>, we collected the resting-state functional MRI data before and after the surgery<sup>13, 14</sup>. Therefore, this fMRI data can provide preliminary evidence for the potential changes after CC7 nerve cross transfer surgery. Previous studies also indicated the influence of somatosensory and motor signal on the language performance; thus, the motor and spasticity changes were also recorded in this study to evaluate the potential connections between motor and language function.

## **Methods**

### **Study Design and Participants**

This is a single center, prospective, observational cohort study approved by the institutional review board. Consent of the study were acquired for all patients participated in this study. In this study, we included patients diagnosed with right hemiplegia combined with aphasia (> 1 year) who were planned to receive contralateral C7 nerve cross transfer surgery to improve the right upper-limb function. The post-stroke aphasia is diagnosed by the Aphasia Quotient (< 93.8) calculated by the Western Aphasia Battery (WAB). The participants should be adults (> 18 years), right-handed, native Chinese speakers with adequate visual and auditory abilities to complete the assessments. Participants were excluded, if they had a speech and language disorder caused by other deficits or before the last disabling stroke (such as neurodegenerative diseases), if they were unable or unwilling to participant in the study, or if they were currently receiving intensive speech and language therapy within four weeks before screening.

### **Intervention**

**CC7 cross transfer Surgery.** The description of the surgical procedure was reported in our previous study and a surgical technique introduction article<sup>10, 15</sup>. The surgery is main performed in three steps, transection of the proximal C7 nerve root on the paralyzed side, transection of the distal C7 nerve root on the intact side, and transferring the intact C7 nerve root to the paralyzed side and anastomosis with the paralyzed C7 nerve root. Briefly, the bilateral brachial plexus nerves were exposed through supraclavicular incision. The C7 nerve

on the paralyzed side is severed near the intervertebral foramen, and the C7 nerve on the intact side is severed as distally as possible before its divisions combine with other divisions from the upper trunk and lower trunk. Then the proximal cut end of the C7 nerve on the intact side is drawn through the prespinal route to the paralyzed side and anastomosed directly to the distal cut end of the C7 nerve on the paralyzed side.

**Postsurgical Rehabilitation.** All patients received standard rehabilitation program according to Huashan Rehab Protocol after CC7 cross transfer surgery<sup>16</sup>, including spasticity control, physical treatment and occupational treatment depending on the nerve regeneration process. During the whole process, no standard speech or language rehabilitation treatment were provided for the patients.

### **Outcomes**

The language and motor function were evaluated at baseline, and 1-week, 6-month after the surgery. The outcomes were defined as the changes of the tests from baseline to follow-up points after the surgery.

For the language function, the WAB and Boston Diagnostic Aphasia Examination (BDAE) scale were used. The WAB applied in this study is consisted of four subtest, spontaneous speech, auditory comprehension, naming and repetition, with a total score of 20, 10, 10 and 10 points, respectively. Based on these four subtests of the WAB scale, the Aphasia Quotient (AQ) is calculated, with a total score of 100 points. In this study, the oral agility subtest from the BDAE scale was evaluated in patient included after 2021, which is consist of verbal and articulatory agility, with a total score of 26 points and higher score indicates better language function.

For the motor function, we used the Upper Extremity part of the Fugl-Meyer scale (UEFM) to evaluate the paralyzed upper limb function, which consisted 33 items and a total score of 66 points, of which higher score indicated better motor function of the upper limb. The spasticity of elbow and finger on the paralyzed side were also evaluated with the Modified Ashworth Scale (MAS), with higher values indicating more spasticity.

To explore the underlying mechanism of improvement in language function after the CC7 cross transfer surgery, we collected the resting-state functional MRI data of 14 patients out of the 16 patients before and after the surgery. To compare the changes induced by the surgery,

the index of amplitude of low frequency fluctuation (ALFF) was used. The fMRI data were processed with using DPABI toolkit implanted in MATLAB. The image data were preprocessed according to standard steps including slice-timing, realign, and normalized with its structural images by DARTEL. The images were smoothed with a Gaussian kernel that was 6-mm full-width at half-maximum and filtered with 0.01-0.1 Hz. The ALFF analyses were calculated in each patient.

## **Statistics**

For demographic data and function data at baseline, descriptive statistics was performed. For continuous variables, functional measures at three time points were analyzed by One-way Repeated Measures ANOVA, followed by Tukey's multiple comparison test between each group. For discrete variables, multiple comparison of measurements at three time points were analyzed with Friedman test, followed by Dunn's multiple comparisons test. Adjusted P value is reported and  $*P < 0.05$  was considered statistically significant. The ratio of change in each scale were calculated as the mean change divided by the total score of the full scale or each subtest. SPSS 22.0 software was used for calculation. Scatter plot and Pearson correlation coefficient was used to described the relationship between change of WAB-AQ and UEFM score. Paired two-sample t-test was performed in the analysis of resting-state fMRI data with the index of ALFF. The statistical threshold was set at  $P < 0.05$  (FDR corrected).

## **Results**

### **Study population**

We identified 32 patients presented with hemiplegia combined with aphasia. Among them, 16 eligible patients were eligible and were included in this study. All 16 patients finished the follow-ups at both one-week and six-months follow-up of the WAB and motor function assessments, while 8 of them additionally finished the BDAE oral agility assessment. The flow chart is shown in Figure 1, and the patient characteristics was listed in Table 1.

### **Outcomes**

In language function tests, the WAB-AQ showed immediate and significant increase from baseline to 1-week (mean change: 8.08, 95% CI: 0.8 to 2.6), and this change maintained

stable to 6-month follow-up (mean change: 9.51, 95%CI: 6.76 to 12.27). The four subtests of the WAB scale all acquired significant increase from baseline to 1-week and 6-month follow-up, including spontaneous speech (average ratio of increase: 8.5% and 11.5%), comprehension (8.1% and 6.6%), repetition (5.3% and 7.3%) and naming (10.1% and 11.2%), respectively (see Table 2 and Figure 2). The difference between 1-week and 6-month follow-up did not meet the lowest significant level ( $P < 0.05$ ) in any of the tests or subtests, with the largest difference seen in spontaneous speech (Mean difference: 0.56, 95%CI: 0.02 to 1.14, adjusted  $P$ : 0.058). In the BDAE-Oral Agility evaluation in 8 patients, the change from baseline to 1-week and 6 month showed similar pattern to WAB tests, see Figure 2.

In the motor function tests, the UEFM score showed significant increase at 6-month follow-up (mean change: 3.6, 95%CI: 2.2-5.0,  $P < 0.001$ ), but not at 1 week after the surgery (mean change: 0.2, 95%CI: 0.8-1.2,  $P = 0.881$ ). The spasticity of the elbow and fingers decreased significantly at 1 week after the surgery ( $P$ : 0.003 and 0.024), but partially recurred at 6-month follow-up ( $P$ : 0.648 and 0.867).

The scattered plot showed the relationship between the change of UEFM score and WAB-AQ score from baseline to 1-week and 6-month follow-up (Figure 3). No association between these two functional changes was shown from the plot. The Pearson correlation coefficient between the change of WAB-AQ and UEFM score from baseline to 1-week was -0.185 with a  $P$ -value of 0.493, which indicated no significant correlation between them. Similarly, the Pearson correlation coefficient between the change of WAB-AQ and UEFM score from baseline to 1-week was -0.191 with a  $P$ -value of 0.478, also show no significant correlation.

In 16 patients, 14 patients accomplished the functional MRI scanning before and after the surgery. Through paired two-sample  $t$ -test of ALFF values of two groups, six brain clusters were detected to be significantly activated after the surgery comparing to the presurgical state, including the right anterior cingulate gyrus, bilateral precentral gyrus, the left middle temporal gyrus, the orbital frontal gyrus and right gyrus rectus (Figure 4, Table 3).

## Discussion

In this prospective cohort study, we found that the language function in hemiplegia



patients with aphasia is significantly improved 1 week after CC7 cross transfer surgery, a surgery designed to improve the limb function of the paralyzed arm. This improvement is maintained to six months follow-up, although no SLT treatment are provided. Therefore, this improvement is more likely to be caused by CC7 transfer surgery, which seems to be “spontaneous” and “immediate”, with an effect size of approximately 10% of language function.

The mechanism underlying the spontaneous improvements in language function is elusive, since the CC7 cross transfer is designed to improve the motor function. In a preliminary peek of the mechanism of this phenomenon, we found that the right hemisphere was largely involved in the functional reorganization after the surgery, including the right precentral cortex, right gyrus rectus, and right anterior cingulate cortex. These regions are frequently reported to be the pivotal regions in compensation of the language function in the subacute or chronic stage<sup>13, 17-19</sup>. Moreover, a pivotal region that plays an important role in language production and naming function, the left middle temporal gyrus (MTG), was also significantly activated after the surgery comparing to presurgical state. The left MTG plays a crucial role in the ventral language network which is responsible for comprehension and semantically driven speech<sup>1, 14</sup>. These findings are in accordance with previous findings, which indicated that the improvement in language function may be related to the interhemispheric functional reorganization. While the left MTG has shown increased activity in resting-state fMRI, the involvement of bilateral hemisphere after CC7 transfer should be noticed. Regions including the right anterior cingulate cortex, right precentral gyrus, and right gyrus rectus were detected to be more active after the surgery. Among them, the right precentral gyrus showed the largest area of increased activity after the surgery. These regions may play important roles in the compensative plasticity of the language network.

From a theoretical perspective, the C7 nerve transection is more likely to be the cause of language improvement, since the functional improvement appeared at 1 week after the surgery and the nerve regeneration hasn't begun yet. The improvement of motor function mainly appears at 1 year after the surgery in previous reports<sup>10, 20</sup>. Since the motor function is deeply involved in the network of language production<sup>21, 22</sup>, it's more likely to be related to the spasticity decrease which also appeared at one-week. However, spasticity would recur

approximately at 3 months after the surgery and sustained to over 6 months after the surgery<sup>10</sup>, but the improvement in language function seemed to be stable over 6 months. Further research is needed to elucidate this question.

Regardless of the mechanism of language improvement, further research should focus on how to apply this surgery to aphasia population with or without hemiplegia. The first thought would be the combination of this surgery with other rehabilitations. The commonly used interventions in treating aphasia focused on promoting the plasticity of the remaining brain<sup>23</sup>, including SLT<sup>7, 24</sup>, noninvasive brain stimulation such as transcranial stimulation<sup>25</sup>. The effects of these methods were reported to be beneficial, but further improvement was still needed<sup>26-28</sup>. As these interventions could vigor the compensational network for the language function, combining these methods with the CC7 nerve transfer or a simplified surgery is promising<sup>29</sup>. The second thought in applying this surgery would be right C7 transection alone rather than CC7 nerve cross transfer. The interpretation of the results of MAS and language function has proved the possibility that C7 transection on the right side could be the most important step for the improvement of language function, and previously reports have proved that transection of C7 nerve alone would not affect the function of the upper limb. Similar to the C8 nerve root transection, C7 transection is safe and more convenient than CC7 cross transfer surgery<sup>30-32</sup>. Therefore, explorative study of C7 transection in treating aphasia should be attempted through well-designed clinical trial studies.

In conclusion, CC7 cross transfer surgery could provide immediate and stable improvements in the language function in hemiplegic patients combined with chronic aphasia. These improvements were likely related to the increased activation of multiple brain areas in bilateral hemispheres, especially the right precentral gyrus, which was suggested to be a potential pivotal area of language compensation in stroke or brain injuries<sup>1, 33, 34</sup>. Further exploration was needed to explore more detailed mechanisms in the following studies.

### **Limitation**

The major limitation of this study is the study design as a preliminary observation. Randomized controlled clinical trial should be performed and more clinical evaluations as

well as clinical neurophysiological studies should be added in further studies.

**Table 1. Demographic characteristics and baseline data of the patients included.**

|                                                      | Statistics             |
|------------------------------------------------------|------------------------|
| <b>Patients included ---no. of patients</b>          | 16                     |
| <b>Age (Years old) --- mean±SD, range</b>            | 45.7±15.9, range 20-71 |
| <b>Sex ---No. of Patients</b>                        |                        |
| Male                                                 | 11                     |
| Female                                               | 5                      |
| <b>Cause of Injury (No. of Patients)</b>             |                        |
| Ischemic stroke                                      | 4                      |
| Hemorrhagic stroke                                   | 8                      |
| Traumatic brain injury                               | 4                      |
| <b>Duration of disease, years --- mean±SD, range</b> | 3.7±4.2, 1-19          |
| <b>WAB --- mean±SD, range</b>                        |                        |
| Spontaneous Speech                                   | 12.1±4.3, 2-18         |
| Comprehension                                        | 7.2±2.0, 3.05-9.85     |
| Repetition                                           | 7.7±2.3, 0.4-10        |
| Naming                                               | 5.1±2.7, 0-8.4         |
| Aphasia Quotient                                     | 63.9±21.6, 10.9-92.5   |
| <b>BDAE Oral Agility --- mean±SD, range*</b>         | 15.9±4.4, 8-22         |
| <b>UEFM score --- mean±SD, range</b>                 | 21.1±12.4, 3-41        |
| <b>MAS score ---no. of patients†</b>                 |                        |
| Elbow                                                | 3(1), 8(2), 5(3)       |
| Fingers                                              | 2(1), 9(2), 5(3)       |

\*The BDAE Oral agility score was collected in 8 patients. † The MAS score was presented with the count of each score. For example, 3(1) referred to that 3 patient had 1 degree MAS score.

**Table 2. Changes of the language and motor function evaluations from baseline to each follow-up.**

|                    | Baseline         | 1 Week            | 6 months         | † P    | Changes from baseline to 1-week p.o. |               |        | Changes from baseline to 6-month p.o. |               |        |
|--------------------|------------------|-------------------|------------------|--------|--------------------------------------|---------------|--------|---------------------------------------|---------------|--------|
|                    | Mean             |                   |                  |        | Mean                                 | 95%CI         | *P     | Mean                                  | 95%CI         | *P     |
| WAB                |                  |                   |                  |        |                                      |               |        |                                       |               |        |
| Spontaneous speech | 12.1             | 13.8              | 14.3             | <0.001 | 1.7                                  | 0.8 to 2.6    | <0.001 | 2.3                                   | 1.3 to 3.2    | <0.001 |
| Comprehension      | 7.2              | 8.0               | 7.8              | <0.001 | 0.81                                 | 0.26 to 1.35  | 0.004  | 0.66                                  | 0.21 to 1.11  | 0.004  |
| Repetition         | 7.7              | 8.2               | 8.4              | 0.002  | 0.53                                 | 0.01 to 1.06  | 0.047  | 0.73                                  | 0.21 to 1.25  | 0.007  |
| Naming             | 5.1              | 6.1               | 6.2              | <0.001 | 1.01                                 | 0.52 to 1.50  | <0.001 | 1.12                                  | 0.52 to 1.72  | <0.001 |
| Aphasia Quotient   | 63.9             | 72.0              | 73.4             | <0.001 | 8.08                                 | 5.05 to 11.10 | <0.001 | 9.51                                  | 6.76 to 12.27 | <0.001 |
| BDAE-Oral Agility  | 15.9             | 20                | 21.5             | 0.004  | 3.7                                  | 0.6 to 6.8    | 0.023  | 5.3                                   | 3.2 to 7.4    | <0.001 |
| UEFM               | 21.1             | 21.3              | 24.7             | <0.001 | 0.2                                  | 0.8-1.2       | 0.881  | 3.6                                   | 2.2-5.0       | <0.001 |
| MAS †              | Number of values |                   |                  | ‡ P    | Number of changed values             |               | *P     | Number of changed values              |               | *P     |
| Elbow              | 3(1), 8(2), 5(3) | 11(1), 5(2), 0(3) | 6(1), 7(2), 3(3) | <0.001 | -2(1), -1(11), 0(4)                  |               | 0.003  | -1(5), 0(11)                          |               | 0.648  |
| Fingers            | 2(1), 9(2), 5(3) | 8(1), 8(2), 0(3)  | 4(1), 9(2), 3(3) | <0.001 | -2(1), -1(9), 0(6)                   |               | 0.024  | -1(4), 0(12)                          |               | 0.867  |

†P value of the repeated one-way ANOVA. ‡ P value of Friedman test for discrete variable. \*P: Adjusted P value for multiple comparison. For continuous variables (WAB and its subtests, BDAE-Oral Agility and UEFM), between different follow-up comparison was performed by the Tukey's multiple comparison test. For discrete variable, the MAS score, Dunn's multiple comparisons test was used. † The MAS score was presented with the count of each change value from baseline to 1-week and 6-month follow-up. For example, -2(1) referred to that 1 patient had 2 degree's decrease in MAS score. p.o., post-operation.

**Table 3. Results of 2-sample t-tests of the ALFF values between the post-surgical and pre-surgical scanning of the patients.**

| Post-surg vs pre-surg |                                 | Number of Voxels | t-value | MNI Coordinates |     |     |
|-----------------------|---------------------------------|------------------|---------|-----------------|-----|-----|
| Region Label          |                                 |                  |         | x               | y   | z   |
|                       | Right anterior cingulate cortex | 24               | 8.855   | 6               | 30  | -9  |
|                       | Left middle temporal gyrus      | 23               | 8.417   | -45             | -45 | 9   |
|                       | Left orbital frontal gyrus      | 55               | 8.340   | -21             | 51  | -15 |
|                       | Right precentral gyrus          | 81               | 7.940   | 30              | -24 | 60  |
|                       | Right gyrus rectus              | 41               | 7.621   | 9               | 57  | -18 |
|                       | Left precentral gyrus           | 38               | 6.875   | -27             | -15 | 60  |

The number of voxels indicated the voxels included in each region detected by 2-sample t-test. The t-value and MNI coordinate indicated the location of peak values in each detected region. MNI, Montreal Neurological Institute template, standard space to identify the coordinates of the brain regions.

**Figure legends:**

**Figure 1.** The flow chart of this study.

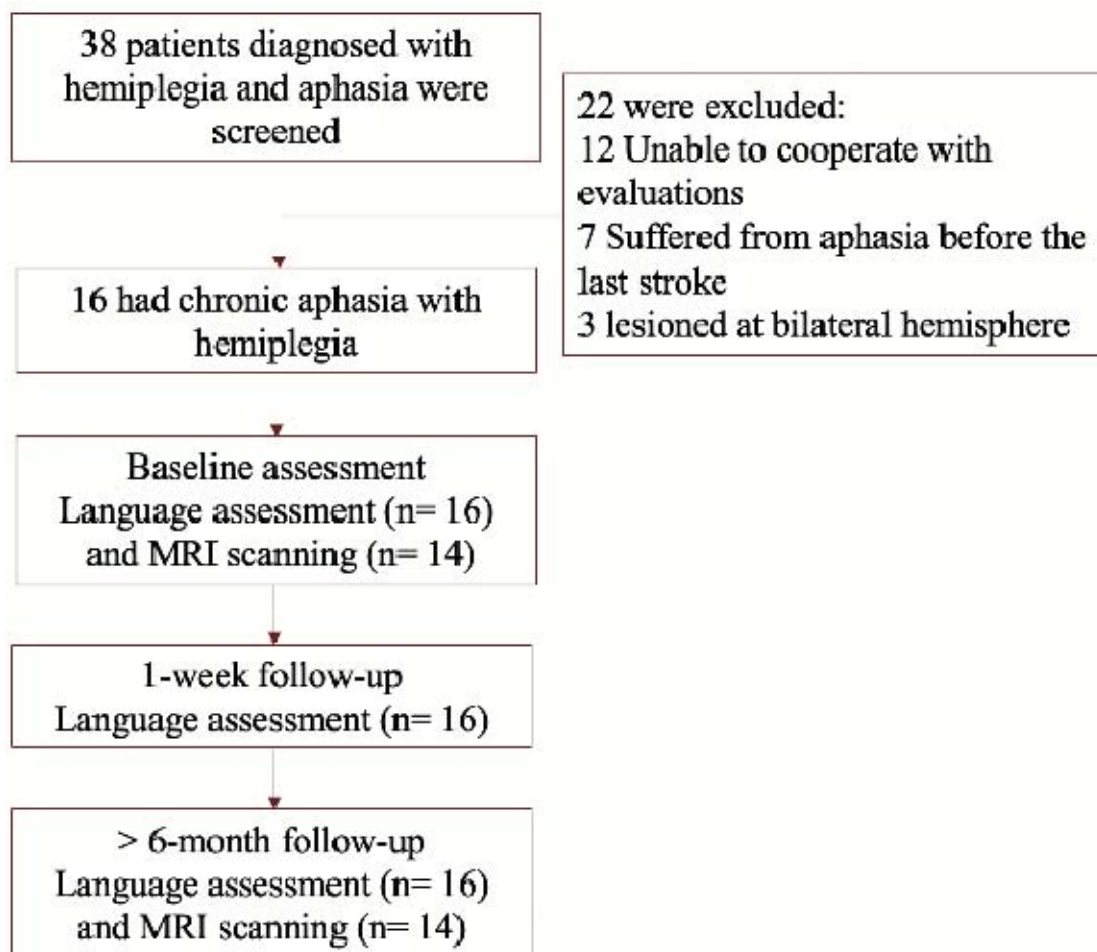

**Figure 2. The scores of Aphasia Quotient and BDAE-oral agility tests at baseline and two follow-up points.** Functional measures were analyzed by One-way Repeated Measures ANOVA, and followed by between group comparison adjusted by Tukey's post hoc test. Adjusted *P*-values were marked, with one asterisk indicated  $P < 0.05$ , and two asterisks indicated  $P < 0.01$ , three asterisks indicated  $P < 0.001$ . Panel a-d: The four subsets of the WAB test in 16 patients, e: The aphasia quotient calculated by the WAB test in 16 patients. f: The BDAE oral agility test in 8 patients.

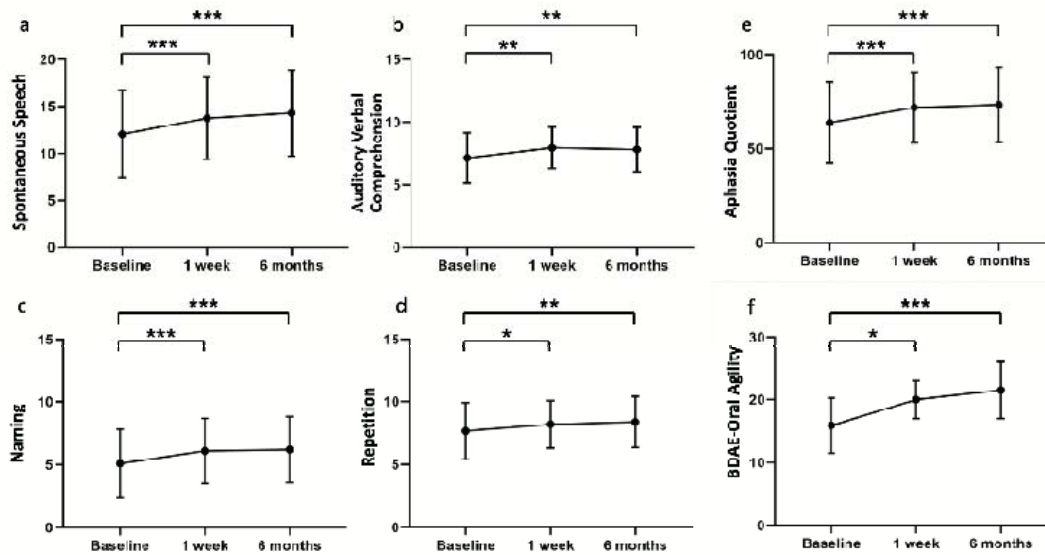



**Figure 3. Scatter plot between the changes of WAB-AQ score and UEFM score from baseline to 1-week and to 6-month follow-up.** The Pearson correlation coefficient and P value of the two change scores.

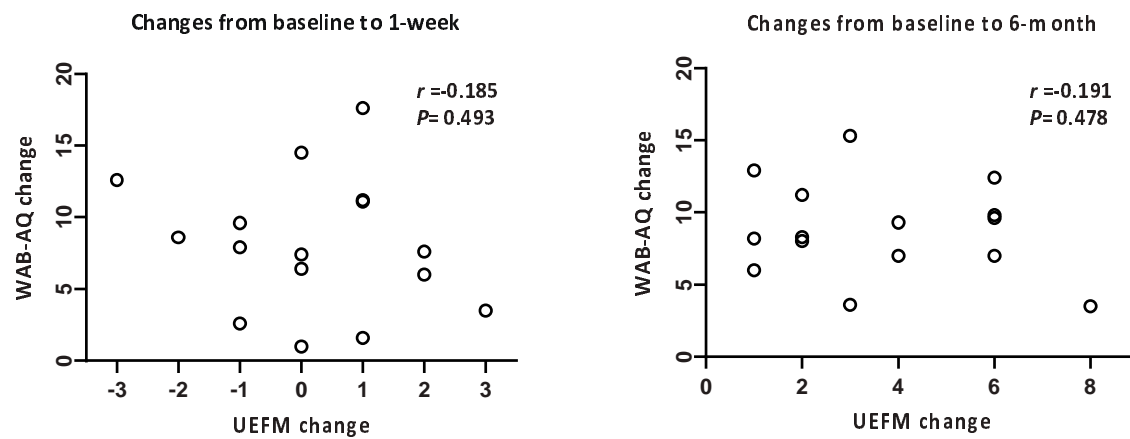

**Figure 4.** The results of paired two sample t-test of the ALFF values from the resting-state functional MRI data of the patients before and after the surgery. The results are shown as the t-value of each voxel in the figures ( $P < 0.05$ , multi-comparison correction through false discovery rate). The voxels in red indicated significantly higher local activations after the surgery comparing to the data before the surgery in an average level. ALFF: amplitude of low-frequency fluctuation.

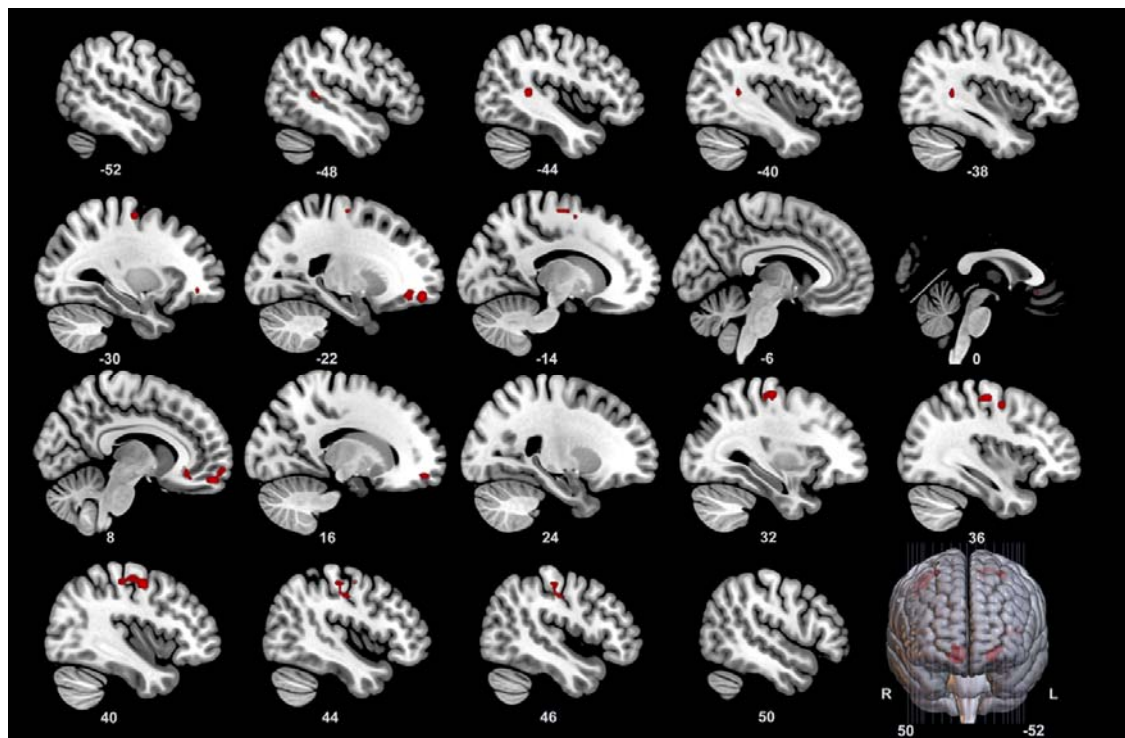

## Reference

1. Stefaniak JD, Halai AD, Lambon Ralph MA. The neural and neurocomputational bases of recovery from post-stroke aphasia. *Nat Rev Neurol* 2020;16:43-55.
2. Engelter ST, Gostynski M, Papa S, et al. Epidemiology of aphasia attributable to first ischemic stroke: incidence, severity, fluency, etiology, and thrombolysis. *Stroke* 2006;37:1379-1384.
3. Flowers HL, Skoretz SA, Silver FL, et al. Poststroke Aphasia Frequency, Recovery, and Outcomes: A Systematic Review and Meta-Analysis. *Arch Phys Med Rehabil* 2016;97:2188-2201 e2188.
4. Maas MB, Lev MH, Ay H, et al. The prognosis for aphasia in stroke. *J Stroke Cerebrovasc Dis* 2012;21:350-357.
5. Meinzer M, Darkow R, Lindenbergh R, Floel A. Electrical stimulation of the motor cortex enhances treatment outcome in post-stroke aphasia. *Brain* 2016;139:1152-1163.
6. Breitenstein C, Grewe T, Floel A, et al. Intensive speech and language therapy in patients with chronic aphasia after stroke: a randomised, open-label, blinded-endpoint, controlled trial in a health-care setting. *Lancet* 2017;389:1528-1538.
7. Brady MC, Kelly H, Godwin J, Enderby P, Campbell P. Speech and language therapy for aphasia following stroke. *Cochrane Database Syst Rev* 2016:CD000425.
8. Albright AL, Barry MJ, Fasick MP, Janosky J. Effects of continuous intrathecal baclofen infusion and selective posterior rhizotomy on upper extremity spasticity. *Pediatr Neurosurg* 1995;23:82-85.
9. Peacock WJ, Arens LJ, Berman B. Cerebral palsy spasticity. Selective posterior rhizotomy. *Pediatr Neurosci* 1987;13:61-66.
10. Zheng MX, Hua XY, Feng JT, et al. Trial of Contralateral Seventh Cervical Nerve Transfer for Spastic Arm Paralysis. *The New England journal of medicine* 2018;378:22-34.
11. Hua XY, Qiu YQ, Wang M, et al. Enhancement of Contralesional Motor Control Promotes Locomotor Recovery after Unilateral Brain Lesion. *Sci Rep* 2016;6:18784.
12. Yu BF, Chen LW, Qiu YQ, et al. Contralateral seventh cervical nerve transfer can affect the pennation angle of the lower limb in spastic hemiplegia patients: An observational case series study. *Brain and behavior* 2019;9:e01460.
13. Castellucci GA, Kovach CK, Howard MA, 3rd, Greenlee JDW, Long MA. A speech planning network for interactive language use. *Nature* 2022;602:117-122.
14. Stefaniak JD, Alyahya RSW, Lambon Ralph MA. Language networks in aphasia and health: A 1000 participant activation likelihood estimation meta-analysis. *Neuroimage* 2021;233:117960.
15. Xu WD. Surgical Technique of Xu's CC7 Procedure "Contralateral C7 to C7 Cross Nerve Transfer Through a Trans Longus Colli, Prespinal Route for Treating Spastic Arm". *Oper Neurosurg (Hagerstown)* 2020.
16. Li J, Ying Y, Su F, et al. The Hua-Shan rehabilitation program after contralateral seventh cervical nerve transfer for spastic arm paralysis. *Disabil Rehabil* 2020:1-8.
17. Chang YN, Lambon Ralph MA. A unified neurocomputational bilateral model of spoken language production in healthy participants and recovery in poststroke aphasia. *Proc Natl Acad Sci U S A* 2020;117:32779-32790.
18. Hartwigsen G, Saur D. Neuroimaging of stroke recovery from aphasia - Insights into plasticity of the human language network. *Neuroimage* 2019;190:14-31.
19. Hartwigsen G, Bzdok D, Klein M, et al. Rapid short-term reorganization in the language network. *Elife* 2017;6.
20. Feng J, Li T, Lv M, et al. Reconstruction of paralyzed arm function in patients with hemiplegia through contralateral seventh cervical nerve cross transfer: a multicenter study and real-world practice guidance.

EClinicalMedicine 2022;43:101258.

21. Xu S, Yan Z, Pan Y, et al. Associations between Upper Extremity Motor Function and Aphasia after Stroke: A Multicenter Cross-Sectional Study. *Behav Neurol* 2021;2021:9417173.
22. Ginex V, Veronelli L, Vanacore N, Lacorte E, Monti A, Corbo M. Motor recovery in post-stroke patients with aphasia: the role of specific linguistic abilities. *Top Stroke Rehabil* 2017;24:428-434.
23. Su F, Xu W. Enhancing Brain Plasticity to Promote Stroke Recovery. *Front Neurol* 2020;11:554089.
24. Breitenstein C, Grewe T, Flöel A, et al. Intensive speech and language therapy in patients with chronic aphasia after stroke: a randomised, open-label, blinded-endpoint, controlled trial in a health-care setting. *Lancet* 2017;389:1528-1538.
25. Fridriksson J, Rorden C, Elm J, Sen S, George MS, Bonilha L. Transcranial Direct Current Stimulation vs Sham Stimulation to Treat Aphasia After Stroke: A Randomized Clinical Trial. *JAMA Neurol* 2018;75:1470-1476.
26. Cook R, Davidson P, Martin R, Centre ND. Computerised speech and language therapy can help people with aphasia find words following a stroke. *BMJ* 2020;368:m520.
27. Grechuta K, Rubio Ballester B, Espin Munne R, et al. Augmented Dyadic Therapy Boosts Recovery of Language Function in Patients With Nonfluent Aphasia. *Stroke* 2019;50:1270-1274.
28. Elsner B, Kugler J, Pohl M, Mehrholz J. Transcranial direct current stimulation (tDCS) for improving aphasia in adults with aphasia after stroke. *Cochrane Database Syst Rev* 2019;5:Cd009760.
29. Crinion JT, Leff AP. Using functional imaging to understand therapeutic effects in poststroke aphasia. *Curr Opin Neurol* 2015;28:330-337.
30. Gu Y, Xu J, Chen L, Wang H, Hu S. Long term outcome of contralateral C7 transfer: a report of 32 cases. *Chin Med J (Engl)* 2002;115:866-868.
31. Monsivais JJ. Contralateral C7 transfers: An innovative approach to improving peripheral neuropathic pain after traumatic brachial plexus injury with C5 rupture and avulsion of C6, C7, C8 and T1. A case series study. *Clinical neurology and neurosurgery* 2020;191:105693.
32. Gu Y, Wang T, Cai P, Shen L. Division of C8 nerve root for treatment of spastic cerebral palsy in the upper limbs: a preliminary report. *Chin Med J (Engl)* 1998;111:874-876.
33. Stockert A, Wawrzyniak M, Klingbeil J, et al. Dynamics of language reorganization after left temporo-parietal and frontal stroke. *Brain* 2020;143:844-861.
34. Hope TMH, Leff AP, Prejawa S, et al. Right hemisphere structural adaptation and changing language skills years after left hemisphere stroke. *Brain* 2017;140:1718-1728.
